# Supplementary material for: Combined QTL and Selective Sweep Mappings with Coding SNP Annotation and cis-eQTL Analysis Revealed PARK2 and JAG2 as New Candidate Genes for Adiposity Regulation
Source: PubMed Central journal article supplement (PMC4390568; doi:10.1534/g3.115.016865), 2015-02-03
Supplement: supp_g3.115.016865_016865SI.pdf [file supp_g3.115.016865_016865SI.pdf]

## Combined QTL and selective sweep mappings with coding SNP annotation and *cis*-eQTL analysis revealed *PARK2* and *JAG2* as new candidate genes for adiposity regulation

Pierre-François Roux<sup>\*,§,†</sup>, Simon Boitard<sup>‡,\*\*</sup>, Yuna Blum<sup>§§</sup>, Brian Parks<sup>§§</sup>, Alexandra Montagner<sup>††</sup>, Etienne Mouisel<sup>‡‡</sup>, Anis Djari<sup>\*\*\*</sup>, Diane Esquerré<sup>§§§</sup>, Colette Désert<sup>\*,§,†</sup>, Morgane Boutin<sup>\*,§,†</sup>, Sophie Leroux<sup>†††</sup>, Frédéric Lecerf<sup>\*,§,†</sup>, Elisabeth Le Bihan-Duval<sup>‡‡‡</sup>, Christophe Klopp<sup>\*\*\*</sup>, Bertrand Servin<sup>†††</sup>, Frédérique Pitel<sup>†††</sup>, Michel Jean Duclos<sup>‡‡‡</sup>, Hervé Guillou<sup>††</sup>, Aldons J. Lusis<sup>§§,\*\*\*\*</sup>, Olivier Demeure<sup>\*,§,†</sup> and Sandrine Lagarrigue<sup>\*,§,†,1</sup>

\* INRA, UMR1348 Pegase, Saint-Gilles, 35590, France

§ Agrocampus Ouest, UMR1348 Pegase, Rennes, 35000, France

† Université Européenne de Bretagne, France

‡ UMR 7205 OSEB (MNHN – CNRS – EPHE – UPMC), Paris, 75005, France

\*\* INRA/AgroParisTech, UMR1313 GABI, Jouy-en-Josas, 78352, France

§§ Department of Medicine/Division of Cardiology, UCLA, Los Angeles, USA

†† UMR1331, INP, UPS, TOXALIM, INRA, Toulouse, France

‡‡ INSERM, UMR 1048 I2MC, 31432 Toulouse, France

\*\*\* INRA, SIGENAE, Castanet-Tolosan, 31326, France

§§§ INRA, Plateforme GENOTOUL, Castanet-Tolosan, 31326, France

††† UMR INRA, INPT ENSAT, INPT ENVT-GENPHYSE, Castanet-Tolosan, 31326, France

‡‡‡ INRA, UR83 Recherches Avicoles, Nouzilly, 37380, France

\*\*\*\* Department of Human Genetics, UCLA, Los Angeles, USA

### Corresponding author

Pr. Sandrine Lagarrigue

65, rue de Saint Briec, Bâtiment 18

35042 Rennes Cedex, FRANCE

Phone: + 33 2 23 48 59 59

Email: sandrine.lagarrigue@agrocampus-ouest.fr

DOI : 10.1534/g3.115.016865

| All types of SNP        | SNP     |       | Genes |
|-------------------------|---------|-------|-------|
|                         | N       | %     | N     |
| Intergenic              | 4513004 | 48.68 | -     |
| Regulatory regions      | 776080  | 8.37  | 17352 |
| Intronic                | 3873604 | 41.78 | 14087 |
| Coding - Synonymous     | 65276   | 0.70  | 11905 |
| Coding - Non Synonymous | 43410   | 0.47  | 10676 |

  

| Coding SNP              | SNP   |       | Genes |
|-------------------------|-------|-------|-------|
|                         | N     | %     | N     |
| Synonymous              | 65276 | 59.45 | 11905 |
| Missense                | 27711 | 25.24 | 8214  |
| Initiator or stop codon | 495   | 0.45  | 461   |
| Splicing site           | 16286 | 14.83 | 7155  |
| Mature mi-RNA           | 34    | 0.03  | 30    |

**Figure S1** Annotation of the 9.4 million SNPs identified in the two lines using whole-genome re-sequencing.

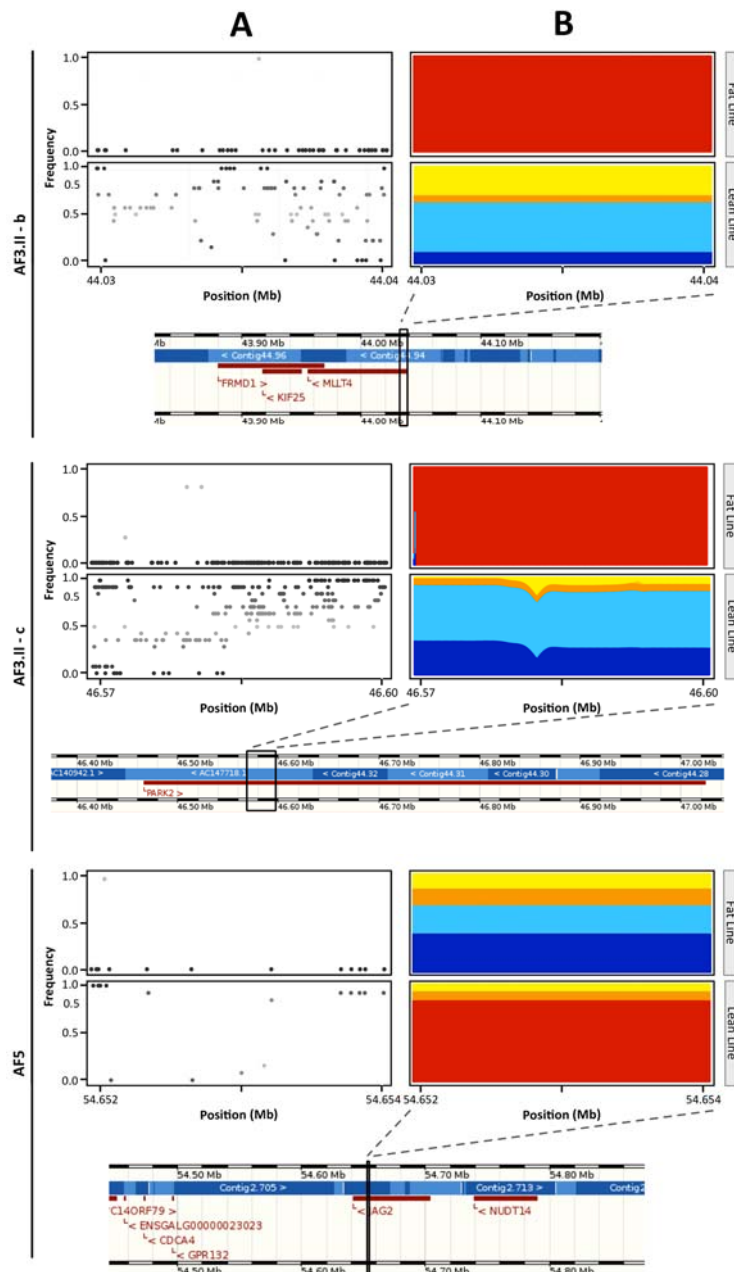

**Figure S2 Allelic and haplotypic cluster frequencies in each sweep underlying QTLs.**

(A) Allelic and (B) haplotypic cluster frequencies for both chicken lines in each selective sweep underlying QTL for abdominal fat weight (AF3.I, AF3.II, AF5). In A, the reference allele used for the SNP frequency calculation is arbitrary. In B, the difference in color along the Y-axis gives the frequencies of each haplotype cluster. The difference in color along the X-axis has no meaning. Almost fixed clusters are colored red. Under each graph, a genomic map gives the position of the sweep (in a black box) along the genome, and highlights genes inside or around the sweep (red).

**Table S1 Description of primers used for SNP validations by Sanger re-sequencing.**

| <b>ID</b>        | <b>Sequence</b>          | <b>Targeted strand</b> | <b>Start Position<sup>1</sup></b> | <b>Length</b> | <b>T<sub>m</sub> (°C)</b> |
|------------------|--------------------------|------------------------|-----------------------------------|---------------|---------------------------|
| <b>JAG2-Fwd1</b> | ACCAGCAGATTCCAGTGCCAC    | +                      | 1                                 | 20            | 64                        |
| <b>JAG2-Fwd2</b> | TCAGTATCTCATGTCAAGTGAC   | +                      | 411                               | 22            | 58                        |
| <b>JAG2-Fwd3</b> | AGTACAAGAAATGCATGGTTCC   | +                      | 844                               | 22            | 59                        |
| <b>JAG2-Fwd4</b> | ACAGTTCTTCTGGTTGTTAAGG   | +                      | 1271                              | 22            | 59                        |
| <b>JAG2-Fwd5</b> | TGCTTCTCAGTCTTTCTTTTAC   | +                      | 1735                              | 22            | 59                        |
| <b>JAG2-Rev1</b> | GCCCCACTAAAACATGAGGG     | -                      | 1                                 | 20            | 59                        |
| <b>JAG2-Rev2</b> | AAGCTAACTCCTTAACAACCAG   | -                      | 517                               | 22            | 58                        |
| <b>JAG2-Rev3</b> | TGGCTTACTGTAAAGCATCAACTG | -                      | 930                               | 24            | 62                        |
| <b>JAG2-Rev4</b> | AATGTCTGGTCATAAGTAGCAG   | -                      | 1333                              | 22            | 58                        |
| <b>JAG2-Rev5</b> | CAATCAAGCAATTGATCGTG     | -                      | 1759                              | 20            | 56                        |

<sup>1</sup> Relatively to the 3' end of the targeted PCR amplicon.

**Tables S2 Description of primers used for RT-qPCR.**

| <b>ID</b>         | <b>Species</b>       | <b>Sequence (5' -&gt; 3')</b> | <b>Length</b> | <b>Tm (°C)</b> |
|-------------------|----------------------|-------------------------------|---------------|----------------|
| <b>GG-JAG2-F</b>  | <i>Gallus gallus</i> | AAATGCAATCACCAAGCGGC          | 20            | 65             |
| <b>GG-JAG2-R</b>  | <i>Gallus gallus</i> | ACCGCACAAAGAATTGGAACC         | 21            | 65             |
| <b>GG-PARK2-F</b> | <i>Gallus gallus</i> | AGCACACCCAACAACACTGACA        | 20            | 60             |
| <b>GG-PARK2-R</b> | <i>Gallus gallus</i> | GAGTCTGGACAGCCAGCTAC          | 20            | 58             |
| <b>GG-MLLT4-F</b> | <i>Gallus gallus</i> | ACTGCCACAACACTCAGGATGT        | 20            | 58             |
| <b>GG-MLLT4-R</b> | <i>Gallus gallus</i> | TTCAGGGCCATTACTCTGAGC         | 21            | 60             |
| <b>GG-GAPDH-F</b> | <i>Gallus gallus</i> | GCTAAGGCTGTGGGGAAAGT          | 20            | 61             |
| <b>GG-GAPDH-R</b> | <i>Gallus gallus</i> | TCAGCAGCAGCCTTCACTAC          | 20            | 60             |
| <b>MM-PARK2-F</b> | <i>Mus musculus</i>  | ATGAATCACAGCCTGCATTGTG        | 22            | 62             |
| <b>MM-PARK2-R</b> | <i>Mus musculus</i>  | TACCACCACACACACAGACTTC        | 22            | 60             |
| <b>MM-HPRT-F</b>  | <i>Mus musculus</i>  | TGGCCATCTGCCTAGTAAAGC         | 21            | 62             |
| <b>MM-HPRT-R</b>  | <i>Mus musculus</i>  | GGACGCAGCAACTGACATTTC         | 21            | 63             |

**Table S3 Description of primers used for pyro-sequencing-based allelic imbalance analyses.**

| <b>Chromosome</b> | <b>SNP position</b> | <b>Forward primer</b>      | <b>Reverse primer</b> | <b>Sequencing primer</b> |
|-------------------|---------------------|----------------------------|-----------------------|--------------------------|
| <b>3</b>          | 46581638            | [BTN]--GTGCAGCTAGTTACAACAG | CCTTGCCAAAGTGAGTGTT   | TTACATTCATTGCATCG        |
| <b>3</b>          | 46581695            | [BTN]--GTGCAGCTAGTTACAACAG | CCTTGCCAAAGTGAGTGTT   | ATTCTTGCAAAAAACATAAA     |

[BTN]-- Biotinylated on 5' end.
