# Supplementary material for: Combined QTL and Selective Sweep Mappings with Coding SNP Annotation and cis-eQTL Analysis Revealed PARK2 and JAG2 as New Candidate Genes for Adiposity Regulation
Source: PubMed Central journal article supplement (PMC4390568; doi:10.1534/g3.115.016865), 2015-02-03
Supplement: supp_g3.115.016865_FigureS1.pdf [file supp_g3.115.016865_FigureS1.pdf]

| All types of SNP        | SNP     |       | Genes |
|-------------------------|---------|-------|-------|
|                         | N       | %     | N     |
| Intergenic              | 4513004 | 48.68 | -     |
| Regulatory regions      | 776080  | 8.37  | 17352 |
| Intronic                | 3873604 | 41.78 | 14087 |
| Coding - Synonymous     | 65276   | 0.70  | 11905 |
| Coding - Non Synonymous | 43410   | 0.47  | 10676 |

  

| Coding SNP              | SNP   |       | Genes |
|-------------------------|-------|-------|-------|
|                         | N     | %     | N     |
| Synonymous              | 65276 | 59.45 | 11905 |
| Missense                | 27711 | 25.24 | 8214  |
| Initiator or stop codon | 495   | 0.45  | 461   |
| Splicing site           | 16286 | 14.83 | 7155  |
| Mature mi-RNA           | 34    | 0.03  | 30    |

**Figure S1** Annotation of the 9.4 million SNPs identified in the two lines using whole-genome re-sequencing.
