# Supplementary material for: Combined QTL and Selective Sweep Mappings with Coding SNP Annotation and cis-eQTL Analysis Revealed PARK2 and JAG2 as New Candidate Genes for Adiposity Regulation
Source: PubMed Central journal article supplement (PMC4390568; doi:10.1534/g3.115.016865), 2015-02-03
Supplement: supp_g3.115.016865_TableS1.pdf [file supp_g3.115.016865_TableS1.pdf]

**Table S1 Description of primers used for SNP validations by Sanger re-sequencing.**

| <b>ID</b>        | <b>Sequence</b>          | <b>Targeted strand</b> | <b>Start Position<sup>1</sup></b> | <b>Length</b> | <b>T<sub>m</sub> (°C)</b> |
|------------------|--------------------------|------------------------|-----------------------------------|---------------|---------------------------|
| <b>JAG2-Fwd1</b> | ACCAGCAGATTCCAGTGCCAC    | +                      | 1                                 | 20            | 64                        |
| <b>JAG2-Fwd2</b> | TCAGTATCTCATGTCAAGTGAC   | +                      | 411                               | 22            | 58                        |
| <b>JAG2-Fwd3</b> | AGTACAAGAAATGCATGGTTCC   | +                      | 844                               | 22            | 59                        |
| <b>JAG2-Fwd4</b> | ACAGTTCTTCTGGTTGTTAAGG   | +                      | 1271                              | 22            | 59                        |
| <b>JAG2-Fwd5</b> | TGCTTCTCAGTCTTTCTTTTAC   | +                      | 1735                              | 22            | 59                        |
| <b>JAG2-Rev1</b> | GCCCCACTAAAACATGAGGG     | -                      | 1                                 | 20            | 59                        |
| <b>JAG2-Rev2</b> | AAGCTAACTCCTTAACAACCAG   | -                      | 517                               | 22            | 58                        |
| <b>JAG2-Rev3</b> | TGGCTTACTGTAAAGCATCAACTG | -                      | 930                               | 24            | 62                        |
| <b>JAG2-Rev4</b> | AATGTCTGGTCATAAGTAGCAG   | -                      | 1333                              | 22            | 58                        |
| <b>JAG2-Rev5</b> | CAATCAAGCAATTGATCGTG     | -                      | 1759                              | 20            | 56                        |

<sup>1</sup> Relatively to the 3' end of the targeted PCR amplicon.
