# Supplementary material for: Combined QTL and Selective Sweep Mappings with Coding SNP Annotation and cis-eQTL Analysis Revealed PARK2 and JAG2 as New Candidate Genes for Adiposity Regulation
Source: PubMed Central journal article supplement (PMC4390568; doi:10.1534/g3.115.016865), 2015-02-03
Supplement: supp_g3.115.016865_TableS2.pdf [file supp_g3.115.016865_TableS2.pdf]

**Tables S2 Description of primers used for RT-qPCR.**

| <b>ID</b>         | <b>Species</b>       | <b>Sequence (5' -&gt; 3')</b> | <b>Length</b> | <b>Tm (°C)</b> |
|-------------------|----------------------|-------------------------------|---------------|----------------|
| <b>GG-JAG2-F</b>  | <i>Gallus gallus</i> | AAATGCAATCACCAAGCGGC          | 20            | 65             |
| <b>GG-JAG2-R</b>  | <i>Gallus gallus</i> | ACCGCACAAAGAATTGGAACC         | 21            | 65             |
| <b>GG-PARK2-F</b> | <i>Gallus gallus</i> | AGCACACCCAACAACACTGACA        | 20            | 60             |
| <b>GG-PARK2-R</b> | <i>Gallus gallus</i> | GAGTCTGGACAGCCAGCTAC          | 20            | 58             |
| <b>GG-MLLT4-F</b> | <i>Gallus gallus</i> | ACTGCCACAACACTCAGGATGT        | 20            | 58             |
| <b>GG-MLLT4-R</b> | <i>Gallus gallus</i> | TTCAGGGCCATTACTCTGAGC         | 21            | 60             |
| <b>GG-GAPDH-F</b> | <i>Gallus gallus</i> | GCTAAGGCTGTGGGGAAAGT          | 20            | 61             |
| <b>GG-GAPDH-R</b> | <i>Gallus gallus</i> | TCAGCAGCAGCCTTCACTAC          | 20            | 60             |
| <b>MM-PARK2-F</b> | <i>Mus musculus</i>  | ATGAATCACAGCCTGCATTGTG        | 22            | 62             |
| <b>MM-PARK2-R</b> | <i>Mus musculus</i>  | TACCACCACACACACAGACTTC        | 22            | 60             |
| <b>MM-HPRT-F</b>  | <i>Mus musculus</i>  | TGGCCATCTGCCTAGTAAAGC         | 21            | 62             |
| <b>MM-HPRT-R</b>  | <i>Mus musculus</i>  | GGACGCAGCAACTGACATTTC         | 21            | 63             |
