# Supplementary material for: Combined QTL and Selective Sweep Mappings with Coding SNP Annotation and cis-eQTL Analysis Revealed PARK2 and JAG2 as New Candidate Genes for Adiposity Regulation
Source: PubMed Central journal article supplement (PMC4390568; doi:10.1534/g3.115.016865), 2015-02-03
Supplement: supp_g3.115.016865_TableS3.pdf [file supp_g3.115.016865_TableS3.pdf]

**Table S3 Description of primers used for pyro-sequencing-based allelic imbalance analyses.**

| <b>Chromosome</b> | <b>SNP position</b> | <b>Forward primer</b>      | <b>Reverse primer</b> | <b>Sequencing primer</b> |
|-------------------|---------------------|----------------------------|-----------------------|--------------------------|
| <b>3</b>          | 46581638            | [BTN]--GTGCAGCTAGTTACAACAG | CCTTGCCAAAGTGAGTGTT   | TTACATTCATTGCATCG        |
| <b>3</b>          | 46581695            | [BTN]--GTGCAGCTAGTTACAACAG | CCTTGCCAAAGTGAGTGTT   | ATTCTTGCAAAAAACATAAA     |

[BTN]-- Biotinylated on 5' end.
